# Supplementary material for: Dynamics of Mycobacterium tuberculosis Lineages in Oman, 2009 to 2018
Source: MDPI journal article supplement (doi:10.3390/pathogens11050541), 2022-05-04
Supplement: s1 [file s1]

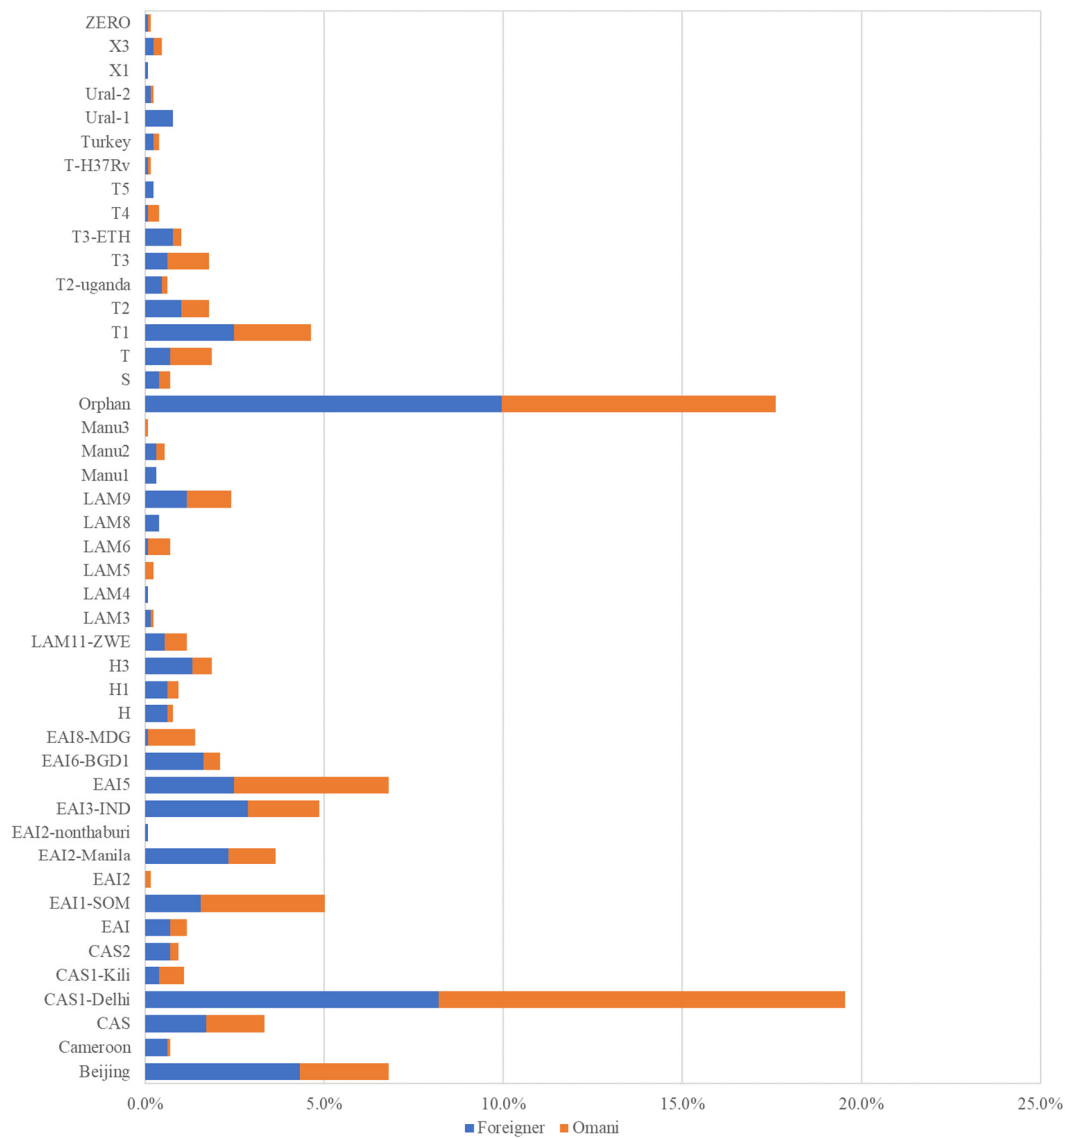

**Supplementary Figure S1.** Proportion of *M. tuberculosis* spoligotypes clades among Omanis and foreigners between 2009 and 2018.



**Supplementary Table S1.** Sociodemographic characteristics of 2,539 TB patients from whom M. tuberculosis isolates were collected between 2009 and 2018.

|                 | 2009  | 2010  | 2011  | 2012  | 2013  | 2014  | 2015  | 2016  | 2017  | 2018  | Total |
|-----------------|-------|-------|-------|-------|-------|-------|-------|-------|-------|-------|-------|
| Expatriate      | 79    | 80    | 90    | 122   | 138   | 164   | 143   | 148   | 116   | 118   | 1198  |
|                 | 31.9% | 35.1% | 32.6% | 42.4% | 50.5% | 57.7% | 54.8% | 55.6% | 51.1% | 62.8% | 47.2% |
| Omani           | 169   | 148   | 186   | 166   | 135   | 120   | 118   | 118   | 111   | 70    | 1341  |
|                 | 68.1% | 64.9% | 67.4% | 57.6% | 49.5% | 42.3% | 45.2% | 44.4% | 48.9% | 37.2% | 52.8% |
| Total           | 248   | 228   | 276   | 288   | 273   | 284   | 261   | 266   | 227   | 188   | 2539  |
| Female          | 77    | 94    | 112   | 136   | 104   | 104   | 111   | 98    | 92    | 62    | 990   |
|                 | 31.0% | 41.2% | 40.6% | 47.2% | 38.1% | 36.6% | 42.5% | 36.8% | 40.5% | 33.0% | 39.0% |
| Male            | 171   | 134   | 164   | 152   | 169   | 180   | 150   | 168   | 135   | 126   | 1549  |
|                 | 69.0% | 58.8% | 59.4% | 52.8% | 61.9% | 63.4% | 57.5% | 63.2% | 59.5% | 67.0% | 61.0% |
| Pulmonary       | 197   | 171   | 234   | 245   | 232   | 235   | 221   | 214   | 198   | 155   | 2102  |
|                 | 79.4% | 75.0% | 84.4% | 85.1% | 85.0% | 82.7% | 84.7% | 80.5% | 87.2% | 82.4% | 82.8% |
| Extra-pulmonary | 51    | 57    | 42    | 43    | 41    | 49    | 40    | 52    | 29    | 33    | 437   |
|                 | 20.6% | 25.0% | 15.2% | 14.9% | 15.0% | 17.3% | 15.3% | 19.5% | 12.8% | 17.6% | 17.2% |
| 0-4             | 3     | 2     | 0     | 6     | 2     | 1     | 0     | 2     | 1     | 0     | 17    |
|                 | 1.2%  | 0.9%  | 0.0%  | 2.1%  | 0.7%  | 0.4%  | 0.0%  | 0.8%  | 0.4%  | 0.0%  | 0.7%  |
| 5-14            | 5     | 0     | 4     | 2     | 3     | 1     | 2     | 0     | 4     | 1     | 22    |
|                 | 2.0%  | 0.0%  | 1.5%  | 0.7%  | 1.1%  | 0.4%  | 0.8%  | 0.0%  | 1.8%  | 0.5%  | 0.9%  |
| 15-24           | 52    | 46    | 44    | 41    | 45    | 42    | 48    | 32    | 28    | 28    | 406   |
|                 | 21.1% | 20.5% | 16.1% | 14.4% | 16.7% | 14.9% | 18.6% | 12.0% | 12.4% | 14.9% | 16.1% |
| 25-34           | 70    | 66    | 88    | 93    | 93    | 104   | 96    | 96    | 71    | 60    | 837   |
|                 | 28.3% | 29.5% | 32.1% | 32.7% | 34.6% | 36.9% | 37.2% | 36.1% | 31.4% | 31.9% | 33.2% |
| 35-44           | 39    | 34    | 42    | 54    | 45    | 46    | 36    | 52    | 38    | 45    | 431   |
|                 | 15.8% | 15.2% | 15.3% | 19.0% | 16.7% | 16.3% | 14.0% | 19.5% | 16.8% | 23.9% | 17.1% |
| 45-54           | 25    | 32    | 39    | 27    | 25    | 38    | 28    | 29    | 33    | 21    | 297   |
|                 | 10.1% | 14.3% | 14.2% | 9.5%  | 9.3%  | 13.5% | 10.9% | 10.9% | 14.6% | 11.2% | 11.8% |
| 55-64           | 28    | 12    | 27    | 28    | 28    | 27    | 18    | 22    | 18    | 14    | 222   |
|                 | 11.3% | 5.4%  | 9.9%  | 9.9%  | 10.4% | 9.6%  | 7.0%  | 8.3%  | 8.0%  | 7.4%  | 8.8%  |
| 65+             | 25    | 32    | 30    | 33    | 28    | 23    | 30    | 33    | 33    | 19    | 286   |
|                 | 10.1% | 14.3% | 10.9% | 11.6% | 10.4% | 8.2%  | 11.6% | 12.4% | 14.6% | 10.1% | 11.4% |
| Al Batinah      | 52    | 52    | 50    | 56    | 50    | 70    | 78    | 67    | 58    | 29    | 562   |
|                 | 21.7% | 26.0% | 22.7% | 23.3% | 18.3% | 25.8% | 31.1% | 29.5% | 28.6% | 17.3% | 24.5% |
| Al Buraimi      | 5     | 4     | 5     | 6     | 6     | 10    | 4     | 4     | 10    | 3     | 57    |
|                 | 2.1%  | 2.0%  | 2.3%  | 2.5%  | 2.2%  | 3.7%  | 1.6%  | 1.8%  | 4.9%  | 1.8%  | 2.5%  |
| Al Dakhiliyah   | 15    | 12    | 10    | 8     | 10    | 34    | 22    | 16    | 12    | 7     | 146   |
|                 | 6.3%  | 6.0%  | 4.5%  | 3.3%  | 3.7%  | 12.5% | 8.8%  | 7.0%  | 5.9%  | 4.2%  | 6.4%  |
| Al Dhahira      | 3     | 4     | 6     | 9     | 4     | 8     | 13    | 6     | 12    | 10    | 75    |
|                 | 1.3%  | 2.0%  | 2.7%  | 3.8%  | 1.5%  | 3.0%  | 5.2%  | 2.6%  | 5.9%  | 6.0%  | 3.3%  |
| Al Sharqiyah    | 9     | 9     | 9     | 17    | 17    | 17    | 18    | 23    | 17    | 13    | 149   |
|                 | 3.8%  | 4.5%  | 4.1%  | 7.1%  | 6.2%  | 6.3%  | 7.2%  | 10.1% | 8.4%  | 7.7%  | 6.5%  |
| Al Wousta       | 0     | 2     | 3     | 0     | 0     | 3     | 1     | 5     | 2     | 3     | 19    |
|                 | 0.0%  | 1.0%  | 1.4%  | 0.0%  | 0.0%  | 1.1%  | 0.4%  | 2.2%  | 1.0%  | 1.8%  | 0.8%  |
| Dhofar          | 32    | 27    | 37    | 38    | 35    | 34    | 29    | 23    | 29    | 23    | 307   |
|                 | 13.3% | 13.5% | 16.8% | 15.8% | 12.8% | 12.5% | 11.6% | 10.1% | 14.3% | 13.7% | 13.4% |
| Musandam        | 2     | 1     | 2     | 1     | 3     | 0     | 0     | 0     | 0     | 0     | 9     |
|                 | 0.8%  | 0.5%  | 0.9%  | 0.4%  | 1.1%  | 0.0%  | 0.0%  | 0.0%  | 0.0%  | 0.0%  | 0.4%  |
| Muscat          | 122   | 89    | 98    | 105   | 148   | 95    | 86    | 83    | 63    | 80    | 969   |
|                 | 50.8% | 44.5% | 44.5% | 43.8% | 54.2% | 35.1% | 34.3% | 36.6% | 31.0% | 47.6% | 42.3% |

**Supplementary Table S2.** TB cases per 100,000 population in different provinces in Oman between 2009 and 2018.

| Province      | 2009 | 2010 | 2011 | 2012 | 2013 | 2014 | 2015 | 2016 | 2017 | 2018 | <i>P</i> -value* |
|---------------|------|------|------|------|------|------|------|------|------|------|------------------|
| Dhofar        | 10.4 | 10.8 | 11.7 | 11.0 | 9.5  | 9.3  | 7.5  | 5.7  | 6.3  | 5.1  | 0.000            |
| Muscat        | 13.0 | 11.5 | 9.8  | 9.6  | 12.8 | 7.8  | 6.7  | 5.8  | 4.4  | 5.5  | 0.001            |
| Musandam      | 4.9  | 3.2  | 6.4  | 2.9  | 7.7  | 0    | 0    | 0    | 0    | 0    | 0.021            |
| Al Buraimi    | 4.2  | 5.5  | 6.4  | 6.7  | 7.2  | 10.0 | 3.9  | 3.6  | 8.7  | 2.6  | 0.805            |
| Al Wusta      | 0.0  | 4.7  | 9.8  | 0.0  | 0.0  | 7.3  | 4.9  | 11.5 | 4.4  | 6.3  | 0.271            |
| Al Batinah    | 0.0  | 6.7  | 6.1  | 6.2  | 5.3  | 5.8  | 4.5  | 6.0  | 5.0  | 1.7  | 0.969            |
| Adh Dhahira   | 1.8  | 2.6  | 3.8  | 5.3  | 2.2  | 4.3  | 6.8  | 2.9  | 5.6  | 4.5  | 0.110            |
| Ad Dakhliyah  | 4.5  | 3.7  | 2.9  | 2.2  | 2.6  | 8.4  | 5.3  | 3.8  | 2.6  | 1.5  | 0.700            |
| Ash Sharqiyah | 0.0  | 2.6  | 2.2  | 3.7  | 3.5  | 2.4  | 2.7  | 4.1  | 3.2  | 1.8  | 0.244            |

\* Linear regression was conducted to test correlation between prevalence and years for each province.

**Supplementary Table S3.** Distribution of *M. tuberculosis* lineages in different provinces in Oman.

|         | Al Batinah    | Al Buraimi   | Ad Dakhiliyah | Ash Sharqiyah | Dhofar        | Muscat         | Total          | P-value |
|---------|---------------|--------------|---------------|---------------|---------------|----------------|----------------|---------|
| EAI     | 74<br>(26.9%) | 5<br>(16.1%) | 15<br>(18.1%) | 19<br>(21.6%) | 34<br>(22.2%) | 143<br>(26.2%) | 288<br>(24.5%) | 0.373   |
| Beijing | 15<br>(5.5%)  | 1<br>(3.2%)  | 5<br>(6.0%)   | 11<br>(12.5%) | 18<br>(11.8%) | 26<br>(4.8%)   | 76<br>(6.5%)   | 0.015   |
| CAS     | 55<br>(20.0%) | 6<br>(19.4%) | 28<br>(33.7%) | 19<br>(21.6%) | 49<br>(32.0%) | 118<br>(21.6%) | 275<br>(23.4%) | 0.017   |
| T       | 38<br>(13.8%) | 4<br>(12.9%) | 10<br>(12.0%) | 8<br>(9.1%)   | 17<br>(11.1%) | 52<br>(9.5%)   | 129<br>(11.0%) | 0.564   |
| H       | 13<br>(4.7%)  | 2<br>(6.5%)  | 2<br>(2.4%)   | 5<br>(5.7%)   | 2<br>(1.3%)   | 24<br>(4.4%)   | 48<br>(4.1%)   | 0.300   |
| LAM     | 10<br>(3.6%)  | 3<br>(9.7%)  | 3<br>(3.6%)   | 5<br>(5.7%)   | 6<br>(3.9%)   | 32<br>(5.9%)   | 59<br>(5.0%)   | 0.552   |
| Others* | 9<br>(3.3%)   | 1<br>(3.2%)  | 2<br>(2.4%)   | 6<br>(6.8%)   | 4<br>(2.6%)   | 12<br>(2.2%)   | 34<br>(2.9%)   | 0.440   |
| Orphan  | 63<br>(22.9%) | 9<br>(29.0%) | 18<br>(21.7%) | 15<br>(17.0%) | 23<br>(15.0%) | 139<br>(25.5%) | 267<br>(22.7%) | 0.065   |
| Total   | 275           | 31           | 83            | 88            | 153           | 546            | 1176           | 1176    |
